# Supplementary material
Source: publisher site journal article supplement (http://kjim.org/upload/media/kjim-2023-363-Supplementary-Fig-1.pdf)
Supplement: Supplementary file 1 [file kjim-2023-363-Supplementary-Fig-1.pdf]

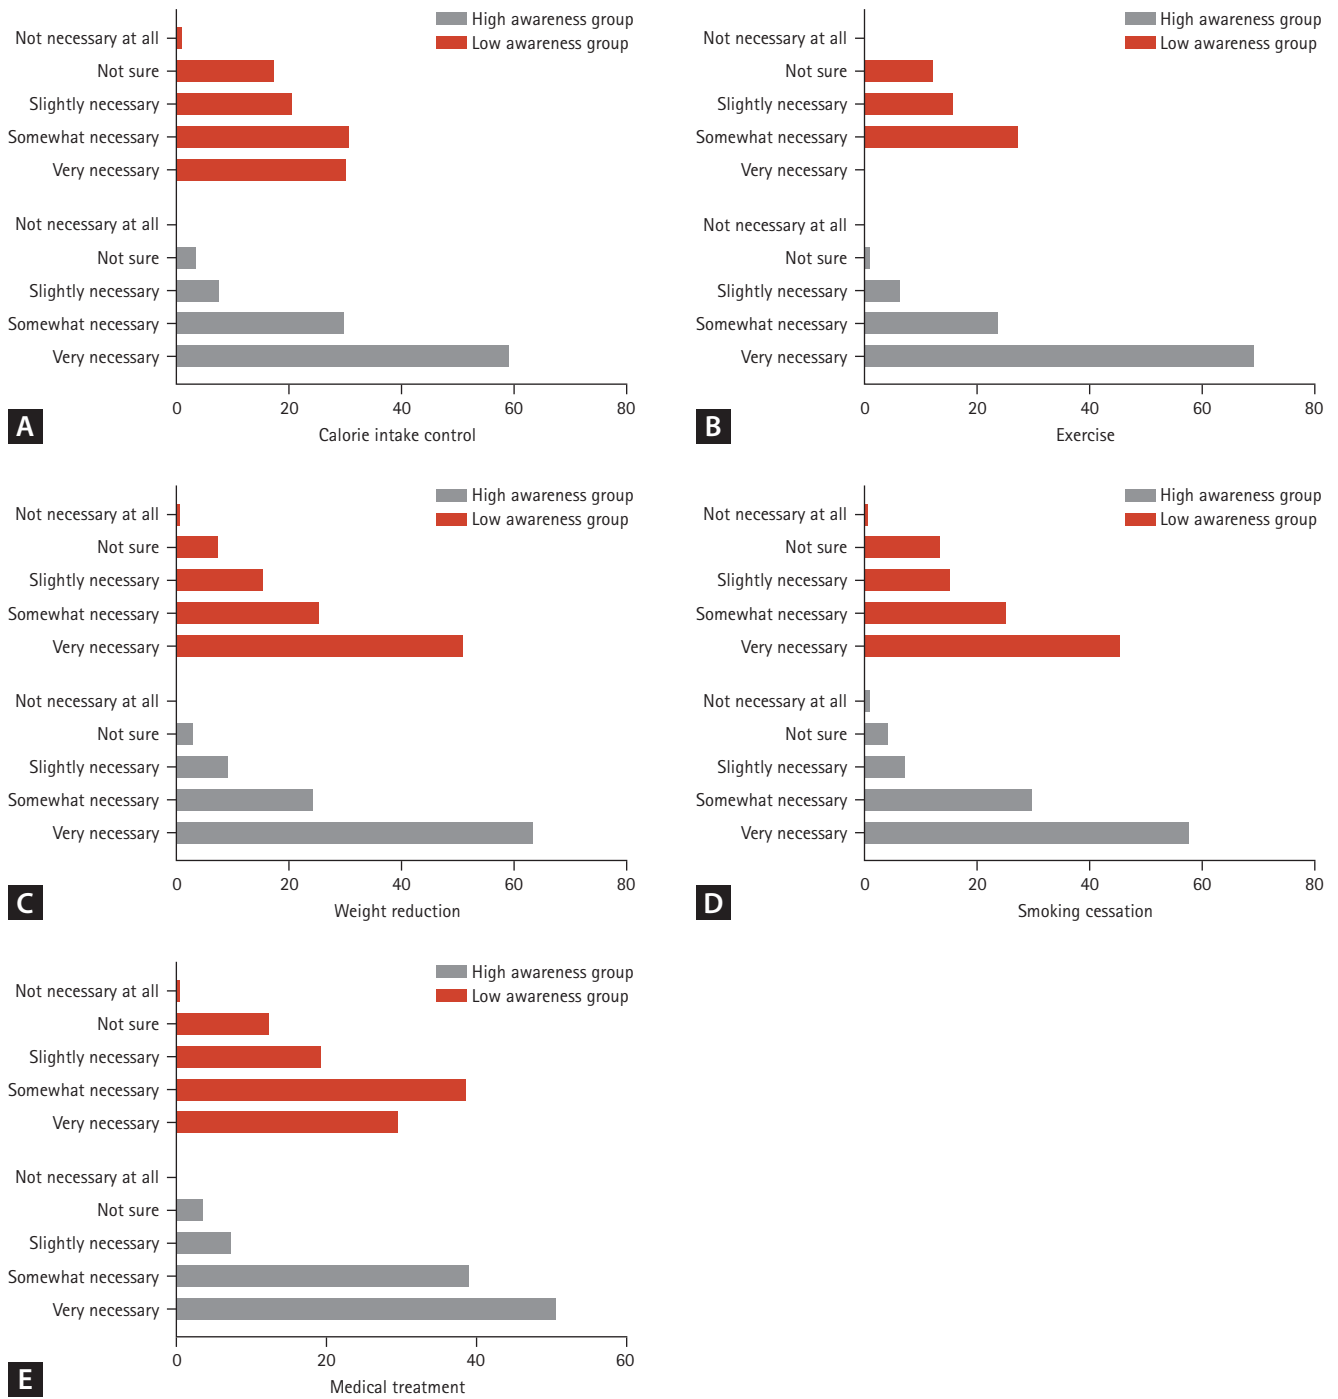

**Supplementary Figure 1.** Differences in awareness of the importance of lifestyle modifications for metabolic syndrome. (A) Calorie intake control. (B) Exercise. (C) Weight reduction. (D) Smoking cessation. (E) Medical treatment.
